# Supplementary material for: Intimate partner violence against women and child maltreatment in a Brazilian birth cohort study: co-occurrence and shared risk factors
Source: HighWire-hosted journal article supplement (doi:10.1136/bmjgh-2020-004306), 2021-04-01
Supplement: bmjgh-2020-004306supp001_data_supplement.pdf [file bmjgh-2020-004306supp001_data_supplement.pdf]

**Supplement Table 1. Tetrachoric correlation between possible risk factors for intimate partner violence and child maltreatment**

|                                 | Neighbourhood violence | Family income | Maternal education | Maternal age | Paternal education | Paternal age | Father lives with child | Father antisocial behaviour | Mother-partner relationship | Maternal depression | Maternal alcohol use |
|---------------------------------|------------------------|---------------|--------------------|--------------|--------------------|--------------|-------------------------|-----------------------------|-----------------------------|---------------------|----------------------|
| duplicates list newid if ano==1 |                        |               |                    |              |                    |              |                         |                             |                             |                     |                      |
| Neighbourhood violence          | 1                      |               |                    |              |                    |              |                         |                             |                             |                     |                      |
| Family income                   | 0.13                   | 1             |                    |              |                    |              |                         |                             |                             |                     |                      |
| Maternal education              | 0.24                   | 0.49          | 1                  |              |                    |              |                         |                             |                             |                     |                      |
| Maternal age                    | 0.04                   | 0.37          | 0.14               | 1            |                    |              |                         |                             |                             |                     |                      |
| Paternal education              | 0.26                   | 0.40          | 0.59               | 0.17         | 1                  |              |                         |                             |                             |                     |                      |
| Paternal age                    | 0.07                   | 0.35          | 0.14               | 0.57         | 0.20               | 1            |                         |                             |                             |                     |                      |
| Father lives with child         | -0.03                  | 0.21          | 0.09               | 0.25         | 0.12               | 0.20         | 1                       |                             |                             |                     |                      |
| Father antisocial behaviour     | 0.19                   | 0.09          | 0.08               | 0.08         | 0.11               | 0.15         | 0.56                    | 1                           |                             |                     |                      |
| Mother-partner relationship     | 0.11                   | 0.09          | 0.20               | 0.13         | 0.16               | 0.15         | 0.13                    | 0.26                        | 1                           |                     |                      |
| Maternal depression             | 0.18                   | 0.27          | 0.29               | 0.10         | 0.20               | 0.02         | 0.14                    | 0.17                        | 0.33                        | 1                   |                      |
| Maternal alcohol use            | -0.07                  | 0.13          | 0.08               | 0.09         | 0.024              | -0.70        | 0.18                    | 0.05                        | 0.05                        | 0.23                | 1                    |
| Maternal illicit drug use       | 0.08                   | -0.01         | 0.14               | 0.22         | 0.02               | 0.20         | 0.35                    | 0.28                        | 0.17                        | 0.25                | 0.03                 |

Note. This table shows the tetrachoric correlations between the dichotomous risk factor variables used to create the cumulative risk score.

**Supplement Table 2. Prevalence of intimate partner violence against women and child maltreatment according to child sex**

|                                             | Boys |      | Girls |      | p*    |
|---------------------------------------------|------|------|-------|------|-------|
|                                             | N    | %    | N     | %    |       |
| Any intimate partner violence against women | 402  | 22.5 | 402   | 23.0 | 0.779 |
| Emotional Violence                          | 384  | 21.4 | 405   | 21.8 | 0.838 |
| Physical Violence                           | 130  | 7.3  | 140   | 7.5  | 0.797 |
| Sexual Violence                             | 28   | 1.6  | 29    | 1.6  | 0.998 |
| Any child maltreatment                      | 225  | 11.9 | 180   | 9.8  | 0.036 |
| Psychological/Emotional abuse               | 162  | 8.5  | 128   | 7.0  | 0.067 |
| Physical abuse                              | 37   | 2.0  | 25    | 1.4  | 0.160 |
| Neglect                                     | 34   | 1.9  | 30    | 1.6  | 0.707 |
| Family abduction/custodial interference     | 39   | 2.1  | 35    | 1.9  | 0.726 |
| Sexual assault by known adult               | 4    | 0.2  | 5     | 0.3  | 0.751 |

\*Fisher exact p-value for comparison of boys and girls

Total numbers of boys=1886; total number of girls=1844
